# Supplementary material for: `4exploring Factors Affecting Health-related Quality of Life Among Hemodialysis Patients
Source: Research Square preprint supplement (doi:10.21203/rs.3.rs-7538130/v1), 2025-10-03
Supplement: Supplementary file 1 [file 2a1f2b1989af125edc0e452a.docx]

**Part 1**

**DEMOGRAPHIC PROFILE**

It consists of demographic variables such as

1. Age
2. 20 – 30 yrs
3. 31-40 yrs
4. 41- 50 yrs
5. > 50 yrs
6. Sex
7. Male
8. Female
9. Income
10. < 10000
11. 10000 – 20000
12. 20000 - 30000

> 40000

1. Education
2. NFE
3. Primary
4. Higher Secondary
5. UG/PG
6. Occupation
7. Yes
8. No
9. No of Dialysis per week
10. Once a week
11. Twice a week
12. Thrice a week
13. No of years on Dialysis

a. 1- 2 year

b. 2- 3 years

c. 3-4 years

d. more than 4 yrs

1. Comorbid Disease
2. Diabetes Mellitus
3. Hypertension
4. Both HT and DM
